# Supplementary material
Source: PubMed Central journal article supplement (PMC30122)
Supplement: pnas_041597098_1.pdf [file pnas_041597098_1.pdf]

## Supplementary Material

**Table 1.** Mutagenic oligomer pairs used to generate truncation and point mutant Tm-

Cyto constructs.

| Name             | Sequence                                                                                                                    |
|------------------|-----------------------------------------------------------------------------------------------------------------------------|
| $\Delta$ 824–839 | Top – CGCCA <u>ACT</u> GAAAGTCAAGTGA <u>AC</u> GGTCCCCAATGAAGCC<br>Bottom – GGCTTCATTGGGGACCGT <u>TCA</u> CTTGACTTCAGTTGGCG |
| $\Delta$ 801–839 | Top – CCACTGACAGAGCCCGAGTGA <u>A</u> AGGGTCCTGTAGAAAC<br>Bottom – GTTCTACAGGACCCTT <u>TCA</u> CTCGGGCTCTGTCAAGTGG           |
| $\Delta$ 791–839 | Top – GGAAGCACACAGAGCCCTGA <u>A</u> ACGAGACCACACCAC<br>Bottom – GTGGTGTGGTCTCGT <u>TCA</u> GGGCTCTGTGTGCTTCC                |
| $\Delta$ 780–839 | Top – GGAGGAGGAACGGACTTG <u>A</u> CCAAACCATGACGGAGG<br>Bottom – CCTCCGTCATGGTTTGGT <u>CA</u> AGTCCGTTCCCTCCTCC              |
| $\Delta$ 745–839 | Top – CTGTGCGGCAAAGCGTGA <u>G</u> GGGCCCGGAGCC<br>Bottom – GGCTCCGGGCCCT <u>CAC</u> GCTTTGCCGCACAG                          |
| T788A            | Top – GAGGGAAGCAC <u>G</u> CAGAGCCCAACGAG<br>Bottom – CTCGTTGGGCTCTG <u>C</u> GTGCTTCCCTC                                   |
| T793A            | Top – GAGCCCAACGAGG <u>C</u> CACACCACTGAC<br>Bottom – GTCAGTGGTGTGG <u>C</u> CTCGTTGGGCTC                                   |
| T794A            | Top – CCCAACGAGACCG <u>C</u> ACCACTGACAGAG<br>Bottom – CTCTGTCAGTGGT <u>G</u> CGGTCTCGTTGGG                                 |
| T797A            | Top – CCACACCACTGGCAGTGCCCGAGAAG<br>Bottom – CTTCTCGGGCTCTG <u>C</u> CAGTGGTGTGG                                            |
| T788D            | Top – GACGGAGGGAAGCAC <u>GAC</u> GAGCCCAACGAGAC<br>Bottom – GTCTCGTTGGGCTC <u>GTC</u> GTGCTTCCCTCCGTC                       |
| T794D            | Top – GAGCCCAACGAGACCG <u>A</u> CCCACTGACAGAGCCC<br>Bottom – GGGCTCTGTCAGTGGG <u>T</u> CGGTCTCGTTGGGCTC                     |
| T797D            | Top – GAGACCACCACTGGAC <u>G</u> AGCCCGAGAAGGG<br>Bottom – CCCTTCTCGGGCTC <u>GTC</u> CAGTGGTGTGGTCTC                         |

Underlined nucleotides indicate added or changed bases.
